# Supplementary material for: Targeting the Prostacyclin Pathway with Selexipag in Patients with Pulmonary Arterial Hypertension Receiving Double Combination Therapy: Insights from the Randomized Controlled GRIPHON Study
Source: Springer Nature journal article supplement (doi:10.1007/s40256-017-0262-z), 2018-01-06
Supplement: MOESM1 [file 24108124]

## Electronic Supplementary Material

### Targeting the prostacyclin pathway with selexipag in pulmonary arterial hypertension patients receiving double combination therapy: Insights from the randomized controlled GRIPHON study

*American Journal of Cardiovascular Drugs*

**Authors:** Dr. J. Gerry Coghlan<sup>1</sup>, Dr. Richard Channick<sup>2</sup>, Dr. Kelly Chin<sup>3</sup>, Dr. Lilla Di Scala<sup>4</sup>, Prof. Nazzareno Galiè<sup>5</sup>, Prof. Hossein-Ardeschir Ghofrani<sup>6,7,8</sup>, Prof. Marius M. Hoeper<sup>9</sup>, Prof. Irene M. Lang<sup>10</sup>, Prof. Vallerie McLaughlin<sup>11</sup>, Dr. Ralph Preiss<sup>4</sup>, Prof. Lewis J. Rubin<sup>12</sup>, Prof. Gérald Simonneau<sup>13,14,15</sup>, Prof. Olivier Sitbon<sup>13,14,15</sup>, Prof. Victor F. Tapson<sup>16</sup>, Prof. Sean Gaine<sup>17</sup>

**Affiliations:** <sup>1</sup>Cardiology Department, Royal Free Hospital, London, UK. <sup>2</sup>Pulmonary and Critical Care, Massachusetts General Hospital, Harvard Medical School, Boston, USA. <sup>3</sup>University of Texas Southwestern, Dallas, TX, USA. <sup>4</sup>Actelion Pharmaceuticals Ltd, Allschwil, Switzerland. <sup>5</sup>Department of Experimental, Diagnostic and Specialty Medicine (DIMES), Bologna University Hospital, Bologna, Italy. <sup>6</sup>University of Giessen and Marburg Lung Center, Giessen, Germany. <sup>7</sup>Member of the German Center of Lung Research (DZL), Giessen, Germany. <sup>8</sup>Department of Medicine, Imperial College London, London, UK. <sup>9</sup>Department of Respiratory Medicine, Hannover Medical School and German Centre for Lung Research, Hannover, Germany. <sup>10</sup>Medical University of Vienna, Department of Internal Medicine II, Division of Cardiology, Allgemeines Krankenhaus, Vienna, Austria. <sup>11</sup>Department of Internal Medicine, University of Michigan Health System, Ann Arbor, MI, USA. <sup>12</sup>Department of Medicine, University of California, San Diego, CA, USA. <sup>13</sup>Assistance Publique–Hôpitaux de Paris, Service de Pneumologie, Hôpital Bicêtre, Le Kremlin–Bicêtre, France. <sup>14</sup>Université Paris-Sud, Laboratoire d’Excellence en Recherche sur le Médicament et Innovation Thérapeutique, Le Kremlin–Bicêtre, France. <sup>15</sup>INSERM U-999, Centre chirurgical Marie Lannelongue, Le Plessis Robinson, France. <sup>16</sup>Cedars-Sinai Medical Center, Los Angeles, California, USA. <sup>17</sup>National Pulmonary Hypertension Unit, Mater Misericordiae University Hospital, Dublin, Ireland.

**Corresponding author:**

Sean Gaine

National Pulmonary Hypertension Unit, Mater Misericordiae University Hospital, Eccles Street,  
Dublin 7, Ireland

Phone: +353 (01) 803 4420

Fax: +353 188 585 95

E-mail: [sgaine@mater.ie](mailto:sgaine@mater.ie)

**Online Table S1 Individualized maintenance dose in patients receiving double combination therapy<sup>a</sup> at baseline**

| Dose groups                        | Twice-daily dose<br><br>µg | Overall <sup>b</sup>                |                                   | WHO FC II symptoms at baseline     |                                  | WHO FC III symptoms at baseline     |                                   |
|------------------------------------|----------------------------|-------------------------------------|-----------------------------------|------------------------------------|----------------------------------|-------------------------------------|-----------------------------------|
|                                    |                            | Selexipag<br>(N = 179)<br><br>n (%) | Placebo<br>(N = 197)<br><br>n (%) | Selexipag<br>(N = 55)<br><br>n (%) | Placebo<br>(N = 60)<br><br>n (%) | Selexipag<br>(N = 122)<br><br>n (%) | Placebo<br>(N = 133)<br><br>n (%) |
| Low-dose group<br>(200–400 µg)     | 200                        | 21 (11.7)                           | 7 (3.6)                           | 6 (10.9)                           | 2 (3.3)                          | 15 (12.3)                           | 5 (3.8)                           |
|                                    | 400                        | 15 (8.4)                            | 5 (2.5)                           | 3 (5.5)                            | 2 (3.3)                          | 12 (9.8)                            | 3 (2.3)                           |
| Medium-dose group<br>(600–1000 µg) | 600                        | 20 (11.2)                           | 4 (2.0)                           | 9 (16.4)                           | 2 (3.3)                          | 10 (8.2)                            | 2 (1.5)                           |
|                                    | 800                        | 29 (16.2)                           | 6 (3.0)                           | 10 (18.2)                          | 1 (1.7)                          | 19 (15.6)                           | 5 (3.8)                           |
|                                    | 1000                       | 16 (8.9)                            | 7 (3.6)                           | 3 (5.5)                            | 3 (5.0)                          | 13 (10.7)                           | 4 (3.0)                           |
| High-dose group<br>(1200–1600 µg)  | 1200                       | 14 (7.8)                            | 5 (2.5)                           | 5 (9.1)                            | 1 (1.7)                          | 9 (7.4)                             | 4 (3.0)                           |
|                                    | 1400                       | 10 (5.6)                            | 18 (9.1)                          | 4 (7.3)                            | 2 (3.3)                          | 6 (4.9)                             | 14 (10.5)                         |
|                                    | 1600                       | 50 (27.9)                           | 143 (72.6)                        | 15 (27.3)                          | 45 (75.0)                        | 34 (27.9)                           | 96 (72.2)                         |

Four patients in the selexipag group (all with WHO FC III symptoms at baseline) and two patients in the placebo group (both with WHO FC II symptoms at baseline) had an individualized maintenance dose of 0 µg and are not reported here.

<sup>a</sup> Receiving an endothelin receptor antagonist and phosphodiesterase-5 inhibitor.

<sup>b</sup> Includes 6 patients with WHO FC IV symptoms at baseline.

WHO FC: WHO functional class.

**Online Table S2 Cumulative incidence of all-cause death up to the end of study in patients receiving double combination therapy<sup>a</sup> at baseline**

|            | Cumulative number of patients with an event of all-cause death up to the end of the study, <i>n</i> |                              |                                             |                             |                                 |                              |
|------------|-----------------------------------------------------------------------------------------------------|------------------------------|---------------------------------------------|-----------------------------|---------------------------------|------------------------------|
|            | Kaplan-Meier survival estimates, % (95% CI)                                                         |                              |                                             |                             |                                 |                              |
|            | Overall <sup>b</sup>                                                                                |                              | WHO FC II symptoms at baseline <sup>c</sup> |                             | WHO FC III symptoms at baseline |                              |
| Time-point | Selexipag<br>( <i>N</i> = 179)                                                                      | Placebo<br>( <i>N</i> = 197) | Selexipag<br>( <i>N</i> = 55)               | Placebo<br>( <i>N</i> = 60) | Selexipag<br>( <i>N</i> = 122)  | Placebo<br>( <i>N</i> = 133) |
| Month 12   | 13<br>92.5 (87.4 to 95.6)                                                                           | 12<br>93.8 (89.3 to 96.4)    | 1                                           | 2                           | 11<br>90.8 (84.0 to 94.8)       | 9<br>93.1 (87.2 to 96.4)     |
| Month 24   | 22<br>84.8 (77.5 to 89.9)                                                                           | 24<br>85.7 (79.3 to 90.2)    | 2                                           | 4                           | 19<br>81.4 (72.1 to 87.9)       | 19<br>83.4 (75.0 to 89.2)    |
| Month 36   | 27<br>77.7 (68.1 to 84.7)                                                                           | 34<br>74.5 (65.2 to 81.6)    | 4                                           | 5                           | 22<br>75.1 (63.4 to 83.6)       | 28<br>68.9 (57.1 to 78.1)    |
| Month 48   | 30<br>64.4 (47.1 to 77.4)                                                                           | 34<br>74.5 (65.2 to 81.6)    | 4                                           | 5                           | 25<br>59.7 (40.2 to 74.7)       | 28<br>68.9 (57.1 to 78.1)    |

Patients who experienced a non-fatal primary endpoint event were eligible to receive open-label selexipag or standard of care, including i.v. prostacyclin analogs, during the study. This cross-over may influence the analysis of all-cause death up to end of study. For patients in the overall population in these analyses, 62% of placebo-treated patients went on to receive open-label selexipag.

<sup>a</sup> Receiving an endothelin receptor antagonist and phosphodiesterase-5 inhibitor.

<sup>b</sup> Includes 6 patients with WHO FC IV symptoms at baseline.

<sup>c</sup> Kaplan-Meier survival estimates and 95% CI not shown as there were too few events to perform meaningful statistical comparisons.

CI: confidence interval; WHO FC: WHO functional class.

**Online Table S3 Prostacyclin-associated adverse events in the titration and maintenance periods for patients receiving double combination therapy<sup>a</sup> and with WHO FC II and FC III symptoms at baseline**

|                                                           | WHO FC II symptoms at baseline |                      |                       |                      | WHO FC III symptoms at baseline |                      |                       |                      |
|-----------------------------------------------------------|--------------------------------|----------------------|-----------------------|----------------------|---------------------------------|----------------------|-----------------------|----------------------|
|                                                           | Titration period               |                      | Maintenance period    |                      | Titration period                |                      | Maintenance period    |                      |
|                                                           | Selexipag                      | Placebo              | Selexipag             | Placebo              | Selexipag                       | Placebo              | Selexipag             | Placebo              |
|                                                           | <i>N</i> = 55                  | <i>N</i> = 60        | <i>N</i> = 51         | <i>N</i> = 54        | <i>N</i> = 122                  | <i>N</i> = 133       | <i>N</i> = 104        | <i>N</i> = 118       |
| Exposure to double-blind treatment, weeks, median (IQR)   | 12.4<br>(12.4, 12.4)           | 12.4<br>(12.4, 12.4) | 56.7<br>(38.9, 122.4) | 59.5<br>(41.6, 89.7) | 12.4<br>(12.4, 12.4)            | 12.4<br>(12.4, 12.4) | 60.3<br>(28.9, 101.0) | 54.2<br>(35.4, 95.4) |
| Patients with ≥1 prostacyclin-associated AE, <i>n</i> (%) | 51 (92.7)                      | 27 (45.0)            | 44 (86.3)             | 28 (51.9)            | 114 (93.4)                      | 81 (60.9)            | 87 (83.7)             | 75 (63.6)            |
| AE, <sup>b</sup> <i>n</i> (%)                             |                                |                      |                       |                      |                                 |                      |                       |                      |
| Headache                                                  | 42 (76.4)                      | 14 (23.3)            | 24 (47.1)             | 10 (18.5)            | 88 (72.1)                       | 48 (36.1)            | 62 (59.6)             | 37 (31.4)            |
| Diarrhea                                                  | 30 (54.5)                      | 4 (6.7)              | 22 (43.1)             | 7 (13.0)             | 54 (44.3)                       | 23 (17.3)            | 45 (43.3)             | 30 (25.4)            |
| Nausea                                                    | 24 (43.6)                      | 9 (15.0)             | 16 (31.4)             | 7 (13.0)             | 44 (36.1)                       | 25 (18.8)            | 32 (30.8)             | 19 (16.1)            |
| Pain in jaw                                               | 19 (34.5)                      | 1 (1.7)              | 18 (35.3)             | 3 (5.6)              | 50 (41.0)                       | 8 (6.0)              | 36 (34.6)             | 11 (9.3)             |

|                                     |           |          |          |          |           |          |           |           |
|-------------------------------------|-----------|----------|----------|----------|-----------|----------|-----------|-----------|
| Vomiting                            | 11 (20.0) | 3 (5.0)  | 4 (7.8)  | 5 (9.3)  | 23 (18.9) | 6 (4.5)  | 12 (11.5) | 8 (6.8)   |
| Myalgia                             | 8 (14.5)  | 1 (1.7)  | 3 (5.9)  | 0        | 15 (12.3) | 7 (5.3)  | 9 (8.7)   | 4 (3.4)   |
| Dizziness                           | 7 (12.7)  | 7 (11.7) | 6 (11.8) | 8 (14.8) | 14 (11.5) | 9 (6.8)  | 14 (13.5) | 16 (13.6) |
| Pain in extremity                   | 7 (12.7)  | 2 (3.3)  | 6 (11.8) | 4 (7.4)  | 28 (23.0) | 9 (6.8)  | 23 (22.1) | 10 (8.5)  |
| Flushing                            | 6 (10.9)  | 3 (5.0)  | 7 (13.7) | 2 (3.7)  | 24 (19.7) | 8 (6.0)  | 22 (21.2) | 8 (6.8)   |
| Arthralgia                          | 2 (3.6)   | 1 (1.7)  | 3 (5.9)  | 3 (5.6)  | 7 (5.7)   | 12 (9.0) | 12 (11.5) | 9 (7.6)   |
| Musculoskeletal pain                | 2 (3.6)   | 0        | 2 (3.9)  | 1 (1.9)  | 7 (5.7)   | 1 (0.8)  | 5 (4.8)   | 4 (3.4)   |
| Temporomandibular joint<br>syndrome | 0         | 1 (1.7)  | 0        | 1 (1.9)  | --        | 1 (0.8)  | --        | --        |

<sup>a</sup> Receiving an endothelin receptor antagonist and phosphodiesterase-5 inhibitor.

<sup>b</sup> Adverse events listed are all those that occurred in any of the patients in any study group during the double-blind period and up to 7 days after placebo or selexipag was discontinued. A patient with multiple occurrences of an adverse event during one treatment period is counted only once in the adverse event category for that treatment and period.

AE: Adverse event; WHO FC: WHO functional class.
